# Supplementary material for: A novel role for the root cap in phosphate uptake and homeostasis
Source: eLife. 2016 Apr 6;5:e14577. doi: 10.7554/eLife.14577 (PMC4829427; doi:10.7554/eLife.14577)
Supplement: Figure 3—figure supplement 1—source data 1. — Quantification of free phosphate present in roots and leaves. DOI: http://dx.doi.org/10.7554/eLife.14577.012 [file elife-14577-fig3-figsupp1-data1.xlsx]

## Sheet: Fig3-supp1
Figure 3-figure supplement 1-source data 1: Effect of PHF1 complementation on free Pi content. Quantification of free phosphate present in roots and leaves.
Free Pi in Leaves or Roots (mg.g FW -1)
	Leaves			Roots
	phf1-1	phf1Q0171	WT	phf1-1	phf1Q0171	WT
Experiment 1	267.593	220.466	450.401	55.05	52.6193	136.022
Experiment 2	208.31	184.237	389.613	35.141	65.3583	165.823
Experiment 3	200.894	234.223	538.436	57.438	74.5154	145.212
