# Supplementary material for: A novel role for the root cap in phosphate uptake and homeostasis
Source: eLife. 2016 Apr 6;5:e14577. doi: 10.7554/eLife.14577 (PMC4829427; doi:10.7554/eLife.14577)
Supplement: Figure 3—figure supplement 3—source data 1. — (A) Effect of PHF1 complementation on locally-regulated gene expression. (B) Effect of PHF1 complementation on systemically-regulated gene expression. DOI: http://dx.doi.org/10.7554/eLife.14577.015 [file elife-14577-fig3-figsupp3-data1.xlsx]

## Sheet: Fig3-supp3A
Figure 3-figure supplement 3A-source data 1: Effect of PHF1 complementation on locally-regulated gene expression.
Expression level of locally regulated genes: normalised values (mean and SD for technical replicates).
	WT				phf1-1				phf1Q0171
	-P		+P		-P		+P		-P		+P
	mean	SD	mean	SD	mean	SD	mean	SD	mean	SD	mean	SD
AT1G67810	991.938	45.8013	364.648	31.9416	1334.07	67.6098	656.221	686.411	636.403	17.8067	381.594	38.7871
AT5G67080	250.366	13.1652	74.4041	5.56795	203	11.028	144.671	30.0061	210.455	12.8323	61.4051	2.9832
AT3G55970	124.724	6.76385	6.42172	0.374677	33.8823	2.3758	2.81921	0.295334	23.8926	0.735198	3.26779	0.418636
AT5G40010	128.236	7.0561	38.002	3.08715	75.6545	3.30394	32.3094	1.57913	144.031	4.66095	22.9406	0.733893
AT5G20230	91.947	5.07712	6.87611	1.09323	47.403	1.49263	3.14797	0.316642	71.1334	3.56612	2.36943	0.100255
AT1G35910	1112.55	50.8003	97.5765	5.93673	632.663	23.3068	138.91	12.3776	828.089	35.0272	102.175	5.06969
AT3G26830	1219.7	57.2072	257.95	13.0763	643.577	28.9135	173.059	9.34477	715.106	24.7272	124.123	5.82266
AT2G39030	93.5092	5.82163	5.21672	0.82327	94.8618	4.03211	3.71667	0.486223	18.6696	2.25225	9.14923	6.41845
AT5G39670	354.517	25.8151	31.283	1.44211	249.801	9.77705	25.1065	1.71688	240.212	9.61739	12.7339	1.42613
AT5G18470	76.495	8.35079	28.9065	1.93413	77.773	5.5965	18.9224	6.3199	77.7604	5.67158	32.3043	1.64389
AT4G11470	36.4301	2.45417	16.1162	3.8524	43.0708	2.3086	8.47907	4.51189	24.971	2.37805	17.1138	2.41992
AT4G23700	186.75	8.7502	47.3147	3.66995	139.25	6.63246	119.444	5.72853	130.87	5.98923	117.174	3.29192
AT3G23240	49.3847	2.6622	8.74752	0.400428	32.7647	3.17376	8.6891	4.64496	22.5849	0.708113	8.19694	0.531885

## Sheet: Fig3-supp3B
Figure 3-figure supplement 3B-source data 1: Effect of PHF1 complementation on systemically-regulated gene expression.
Expression level of systemically regulated genes: normalised values (mean and SD for technical replicates).
	WT				phf1-1				phf1Q0171
	-P		+P		-P		+P		-P		+P
	mean	SD	mean	SD	mean	SD	mean	SD	mean	SD	mean	SD
AT3G02870	742.847	34.6684	169.601	9.28892	847.154	36.6787	489.832	22.2218	929.679	26.4803	310.526	12.2426
SQD2	15865.8	723.661	1267.32	62.7401	13290.8	424.386	11148.5	749.834	15497.8	450.206	4633.26	165.322
AT1G08650	909.616	43.1041	108.571	5.18987	966.875	35.0668	493.792	24.7421	680.25	28.7507	152.883	4.48675
AT1G13750	3678.38	205.635	792.108	60.8528	2109.68	126.532	1441.45	66.2906	2384.1	91.2879	787.167	127.198
AT1G17710	9830.31	1011.93	3.42926	0.497363	7173.54	292.617	4155.91	808.844	9786.7	647.766	1000.85	256.281
AT1G73010	3984.37	206.246	27.2135	1.45718	3555.72	137.733	1031.71	36.425	4345.7	141.379	329.732	16.3901
MGD3	5982.54	293.791	85.6353	5.46915	7661.35	335.138	5296.34	222.283	7174.76	225.878	925.893	42.9677
PAP12	2976.14	146.382	820.256	40.4387	1529.74	49.829	1111.98	41.5806	3664.84	130.553	1581.67	58.0409
PHT1;4	6604.85	303.384	448.978	32.4535	6388.53	315.91	3186.29	143.817	6414.31	402.47	2057.87	72.8355
SPX3	7998.16	370.728	15.349	3.00608	6646.26	360.529	3188.69	99.9593	10762.4	332.434	783.72	38.539
AT3G02040	2665.07	121.101	301.251	15.2756	2076.72	66.7413	1702.64	54.4041	2516.01	70.9612	1083.08	30.5354
PLDz2	4501.55	280.588	326.28	15.5069	5068.33	247.993	2398.94	140.742	4600.9	190.343	1013	47.2394
AT3G43110	990.841	52.9521	88.1329	4.7173	1033.54	36.4913	790.76	30.0715	1109.11	36.1696	275.696	10.1054
AT4G03960	168.773	8.94315	19.5431	1.06233	171.376	5.59409	114.507	6.94314	181.938	5.17357	53.2621	2.01735
SQD1	1640.2	86.8393	161.26	11.9356	1432.59	49.5673	953.753	56.4474	1564	85.6756	436.439	16.3288
SPX1	22991.5	1050.37	597.257	37.3034	14016.8	441.391	9594.29	299.968	15934.4	459.509	4276.19	122.413
MGD2	58.6214	2.68612	5.70093	0.287253	63.5335	6.79496	47.1654	2.63452	55.7772	3.60119	13.5365	0.736396
AT5G20790	4244.31	205.619	72.2439	5.69802	3297.66	107.757	2784.6	110.386	4718.53	147.242	1613.83	76.528
ACP5	226.799	10.5202	20.8844	1.37083	234.946	8.8722	138.643	9.63401	253.815	8.34332	80.9096	8.25159
AT3G19970	1179.84	66.4112	310.227	14.521	959.015	31.677	808.13	31.7408	1371.04	62.5999	696.252	36.4708
AT5G64000	346.945	16.6443	41.7023	4.41002	339.766	11.2411	218.512	11.0305	467.894	17.4324	107.175	5.28086
AT4G10120	696.574	33.0977	61.4167	3.00964	648.919	34.488	326.588	17.5545	811.906	27.1391	130.373	5.80448
AT1G03170	46.2096	3.27756	1.39224	0.162299	41.3419	4.15403	5.04452	0.17921	55.2467	3.58101	1.53156	0.175638
AT2G42690	1073.79	63.9893	230.299	10.6285	842.966	36.367	710.707	23.2506	941.07	42.3392	391.702	15.4072
PHO1-H1	1275.31	60.8076	255.381	12.6034	1205.1	39.8514	1165.92	50.7683	1368.26	43.5518	745.532	56.3004
AT5G17340	6815.42	374.056	66.8396	6.70878	4371.03	145.134	3146.6	116.083	5203.37	148.812	1099.42	40.3174
AT5G63680	1355.5	68.3413	421.515	20.6084	1321.78	44.3844	820.88	57.1025	1418.11	65.3358	537.827	18.1502
