# Supplementary material for: A novel role for the root cap in phosphate uptake and homeostasis
Source: eLife. 2016 Apr 6;5:e14577. doi: 10.7554/eLife.14577 (PMC4829427; doi:10.7554/eLife.14577)
Supplement: Supplementary file 1. — (A) Primers used for constructs. (B) Primers used for RT-qPCR. DOI: http://dx.doi.org/10.7554/eLife.14577.020 [file elife-14577-supp1.xlsx]

## Sheet: supp file1A
Supplementary file 1A: Primers used for constructs
	Reverse	Forward
PHF1	CCCACCGACTCCTTCTATAGGTCCAA	CCCCCTCAGGATCCATGAGATGG
PHT1;4 CDS	AACTATTGGGACCGTTCTACTATC	CACCATGGCAAGGGAACAATTACAAGTG
mCherry	GGGGCAACTTTGTATAATAAAGTTGCTTGTACAGCTCGTCCATGC	GGGGCAGCTTTCTTGTACAAAGTGGTGAGCAAGGGCGAGGAGGA
FCY	TCCACGATCTTCATCTCACCAATATCTTCAAA	GGGACAAGTTTGTACAAAAAAGCAGGCTTAATGGTGACAGGGGGAATG
UPP	GGGGACCACTTTGTACAAGAAAGCTGGGTCTTATTTCGTACCAAAGATTTT	AAGATATTGGTGAGATGAAGATCGTGGAAGTC

## Sheet: supp file1B
Supplementary file 1B: Primers used for RT-qPCR
AGI	reverse	forward
Systemically regulated genes
AT3G02870	TTACCGGATGGATCAAAGATG	CTTCTACGAGCTCGGTTTCG
AT5G01220	TGTGAGAGTTCATCGCCTTG	TACCTGAAGCTCGGATTGCT
AT1G08650	GATCGAAACAGAGGGATGGA	CTCTCTCCGACGACCTTGAC
AT1G13750	AAACTGGTGCGTTTGGATTC	AGCGCCTGTCAAGTTTCAAT
AT1G17710	CAACGAGAGCAACCATGAGA	TTAGGGTGCGAGCTGAGAAT
AT1G73010	GACGACACGTGGATGAATTG	TCATGATCAAGGCAAAACCA
AT2G11810	CATCAGAGGATGCACGCTAA	AGAGGCCGGTTTAATGGAGT
AT2G27190	CAACGAACCTTCCCCAAGTA	TGAGATGAATCCGGGAAAAG
AT2G38940	CCATCACAGCTTTTGGCTCATG	CCTCGGTCGTATTTATTACCACG
AT2G45130	CCTCCTCTTGTTCGCTTGTC	ATGGCGAAATGGTTCTGCTA
AT3G02040	GTCGTCGGTTGCGACGCTCCACTT	ACGGGCCACAGAGGGATACAGGCA
AT3G05630	TTTTGAAGCCGTTTCTTGCT	TGCATTGCTGGAGACAAAAG
AT3G43110	TTGTCCCCAACATGTCTCAA	CGTGTACGTAACGGTGGTTG
AT4G03960	CCTCTTGGAGCATGAGAAGG	GCAGCTGCGAAAGCTAGAAT
AT4G33030	AGGCTCAAGTCCAAGTTCCA	AGCTTGGGCTAGACGTGAAA
AT5G20150	GCGGCAATGAAAACACACTA	CGGGTTTTGAAGGAGATCAG
AT5G20410	TGGTCCAGCTTTTGTGATGA	ACAAGAAATTGGCATCTGCAT
AT5G20790	TATTAACGGCTCCGTTTTCG	CGTCTCGAACCGAAATCAAT
AT3G17790	TTTGACATAAGAGTTGCGAGATG	GTGAGCTTCAGAGATTTATAGAGCC
AT3G19970	ACGCAGCTGAGAAACCTGAT	CGTCTTTCACACCTTCAGCA
AT5G64000	CGCAGATCTCCAGTTTCCTC	CAGCTGATTACGGCTCACAA
AT4G10120	TGAGATCCGCCATTCTCTTT	GCCTCCACAAAACCATCATT
AT1G03170	CCACTCTCGCTTCCTGTTTC	AGCTTATGTTCACCCGATGG
AT2G42690	AAGATCCTGGCACCAAACAC	TAGCTGGATGGAATGGGAAG
AT1G68740	GCCACCACAAGACAGAGCCAACCAAGGC	AGCAATGCAGTGTGCAAGGAGGTGGT
AT5G17340	CGGGTGGAAGCCGGCTGGGATTGG	TGGCCATTCCCCACCACCGGAAAGG
AT5G63680	GCCTCGATGCAGATTTTAGC	TCACAGCCACTCAAATGCTC
Locally regulated genes
AT1G67810	TCATCCTCCCAAACTCATCC	TCACGGGATGTACGACTCAA
AT5G67080	ACACCGATGCGTAACAACAA	AGTGGTAAAACGGCATGGAG
AT3G55970	TGCTCAGCATCTGAATTTGG	TCGGTATCTCTCCGCACTCT
AT5G40010	CTCTCACCACCACAAGCTGA	ACTAGCCCGATTGAGAAGCA
AT5G20230	TCCTCCAGTACTTGGGGTTG	CGTTCCTCCGGTCAAAATTA
AT1G35910	CAATGGGGGATAATGTACCG	CCCGTCAGCTTTAACCATGT
AT3G26830	TCCAGGCTTAAGATGCTCGT	CGGAAGAATCGGTAGGTTCA
AT2G39030	GCGGTCAGTAGCAGTTTTCC	GTGGCTGGATTCGTTCTGTT
AT5G39670	TCCCTCGTTTTCTTGGTCAG	AGGTTCTGGCCTCTTGTTCA
AT5G18470	ATTGGCATCCATCAGGAAAG	GAGAAGCCAACGGCTTGTAG
AT4G11470	TATAACCATCCCACCGGAAA	GCTGCAATGGGTTCATAGGT
AT4G23700	GTGACTTCCCCACCAAGAAA	AATTCAAACCGGAAAACGTG
AT3G23240	ACCCTCTCATCGAGAAAGCA	TTCCGATCAAATCCGTAAGC
Reference genes
AT1G32050	TCCTCATGGCTCGGTAGAGT	TCTGGCTTTCGCTAGTTGGT
AT2G16600	TCGGTGAAAGCTTGATCCTT	ATCGTGATGGAGCTTTACGC
AT3G04120	TGGAGCGTCTTTGCTGGGGGCAGA	TGGGCCGAGGCTGGAGCTGACTACG
